# Supplementary material for: Binder-free heat dissipation films assembled with reduced graphene oxide and alumina nanoparticles for simultaneous high in-plane and cross-plane thermal conductivities
Source: Royal Society of Chemistry journal article supplement (doi:10.1039/c9tc02143d), 2019-01-01
Supplement: c9tc02143d1.pdf [file c9tc02143d1.pdf]

## Electronic Supplementary Information

# Binder-Free Heat Dissipation Films Assembled with Reduced Graphene Oxide and Alumina Nanoparticles for Simultaneously High In-Plane and Cross-Plane Thermal Conductivities

Sunghwan Hong <sup>a</sup>, Seong Soo Yoo<sup>a</sup>, and Pil J. Yoo<sup>a\*</sup>

<sup>a</sup>. School of Chemical Engineering and SKKU Advanced Institute of Nanotechnology (SAINT), Sungkyunkwan University (SKKU), Suwon 16419, Republic of Korea

\* E-mail: [pjyoo@skku.edu](mailto:pjyoo@skku.edu)

### S1. TEM observation of alumina NPs and nanoscale-voids of alumina NPs

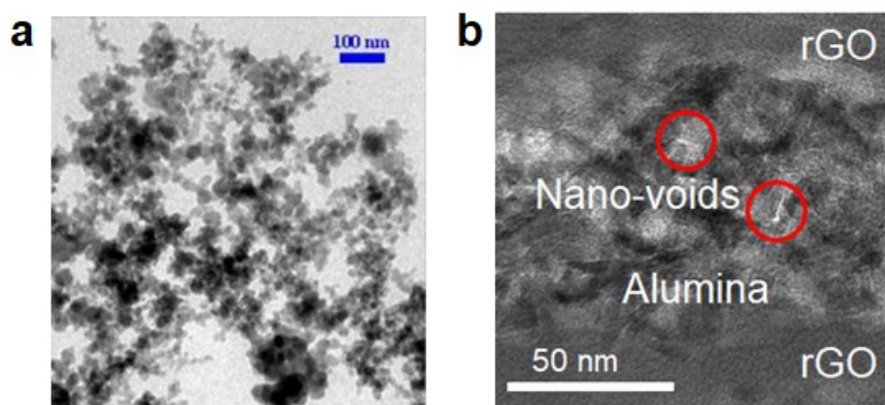

**Figure S1.** (a) TEM image of 80 nm-sized alumina NPs (purchased from Korea Nanomaterials, image is available at the company's website: [https://koreanano.co.kr/shop/item.php?it\\_id=KRU3008](https://koreanano.co.kr/shop/item.php?it_id=KRU3008)), (b) Cross-sectional TEM observation of rGO/alumina complexed film.

### S2. Thickness and size information of the Cu, rGO, and rGO/alumina films.

**Table S2.** Thickness and diameter of Cu, rGO and rGO/alumina films.

| Sample      | Thickness         | Size          |
|-------------|-------------------|---------------|
| Cu          | 10 $\mu\text{m}$  | Diameter 4 cm |
| rGO         | 9.3 $\mu\text{m}$ | Diameter 4 cm |
| rGO/alumina | 9.8 $\mu\text{m}$ | Diameter 4 cm |

### S3. Electrical insulation between LED and heat dissipation film for thermal management tests.

**Table S3.** Measured electrical resistivities of heat dissipation films before and after applying silicon-based grease

|             | Electrical resistivity<br>without grease ( $\Omega.m$ ) | Electrical resistivity<br>with grease ( $\Omega.m$ ) |
|-------------|---------------------------------------------------------|------------------------------------------------------|
| Cu          | $2.2 \times 10^{-8}$                                    | $5.49 \times 10^4$                                   |
| rGO         | $1.6 \times 10$                                         | $6.71 \times 10^4$                                   |
| rGO/alumina | $4.2 \times 10$                                         | $7.24 \times 10^4$                                   |
